# Supplementary material for: Computer-Aided Design of an Epitope-Based Vaccine against Epstein-Barr Virus
Source: J Immunol Res. 2017 Sep 28;2017:9363750. doi: 10.1155/2017/9363750 (PMC5651165; doi:10.1155/2017/9363750)
Supplement: Supplementary file 1 — Additional File S1. Experimentally determined EBV-specific T and B cell epitopes. EBV-specific epitopes are included in three tables: Table S1A (CD8 T cell epitopes), Table S1B (CD4 T cell epitopes) and Table S1C (B cell epitopes). Tables are depicted in three sheets of the excel file. Additional File S2. Conserved EBV-specific CD8 T, CD4 T and B cell epitopes. Conserved epitopes are included in three tables: Table S2A (Conserved EBV-specific CD8 T epitopes), Table S2B (Conserved EBV-specific CD4 T epitopes) and Table S2C (conserved EBV-specific B cell epitopes). Tables are depicted in three sheets of the excel file. Additional File S3. Figure S1. Structural mapping of experimental gb350 B cell epitopes that were discarded. Figure depicts the location in the relevant 3D-structure of conserved gb350 B cell epitopes that were discarded for epitope-vaccine design. Conserved EBV B cell epitopes SVKTEMLGNEID and QVSLESVDVYFQDVFGTMWC were discarded because mapped onto buried or semi-buried regions of gp350 (PDB code: 2H6O). The conserved EBV epitope TNTTDITYVGD was discarded because mapped onto a highly structured and rigid region. The gp350 3D-structure is shown as a pale green ribbon backbone but the epitopes that are shown as sticks. Figure was rendered using PyMOL. [file 9363750.f1.xls]

## Sheet: Table S1A. CD8 epitopes
Table S1A: EBV-specific CD8 T cell epitopes elicited in the course of a natural infection by EBV
Epitope	Antigen ID	Antigen name	Experimental HLA I restriction
LLIEGIFFI	BaRF1	AFJ06848.1	HLA-A*02:01
RFIAQLLLL	BARF1 protein	CAD53469.1	HLA-A*02:01
AFLGERVTL	BARF1 protein	CAD53469.1	HLA-A*02:01
FLGERVTLT	BARF1 protein	CAD53469.1	HLA-A*02:01
TLTSYWRRV	BARF1 protein	CAD53469.1	HLA-A*02:01
KLGPGEEQV	BARF1 protein	CAD53469.1	HLA-A*02:01
TPSVSSSISSL	BFRF3	YP_001129448.1	HLA-B*07:02
VEDLFGANL	BKRF2	AFY97944.1	HLA-B60
VLFGLLCLL	BNLF2a	YP_401721.1	HLA-A2
YPRNPTEQGNI	BNRF1	AGZ95154.1	HLA-B*07:02
WQWEHIPPA	BNRF1	AGZ95154.1	HLA-A*02:01
RAKFKQLLQ	BZLF1	AAA66529.1	HLA-B8
RKCRAKFKQLLQH	BZLF1	AAA66529.1	HLA-Cw6
LPCVLWPVL	BZLF1	AAA66529.1	HLA-B*07:02
SENDRLRLL	BZLF1	AAA66529.1	HLA-B60
TLDTKPLSV	DNA polymerase processivity factor BMRF1	SRC280248	HLA-A*02:01
YRSGIIAVV	Early antigen protein D	P03191.1	HLA-B*39:06
FRNLAYGRTCVLGK	Early antigen protein D	P03191.1	HLA-C*03:04
TLDYKPLSV	Early antigen protein D	P03191.1	HLA-A*02:01
RPQGGSRPEFVKL	Early antigen protein D	P03191.1	HLA-B*07:02
CYDHAQTHL	Early antigen protein D	P03191.1	HLA-A*24:02
FRNLAYGRTCVLGKE	Early antigen protein D	P03191.1	HLA-Cw3
HPVGEADYFEY	EBNA-1	YP_401677.1	HLA-B35
RPSCIGCKGTHGGTG	EBNA-1	YP_401677.1	HLA class I
GGSKTSLYNLRRGTA	EBNA-1	YP_401677.1	HLA class I
PGTGPGNGLGEKGDT	EBNA-1 protein	Q777E1	HLA class I
YFMVFLQTHIFAEVL	EBNA-1 protein	Q777E1	HLA class I
PPMVEGAAAEGDDGD	EBNA-1 protein	Q777E1	HLA class I
FMVFLQTHI	EBNA-1 protein	Q777E1	HLA-A*02:01
VLKDAIKDL	EBNA-1 protein	Q777E1	HLA-A*02:03
HPVGEADYF	EBNA-1 protein	Q777E1	HLA-B*53:01
RLRAEAQVK	EBNA3A nuclear protein	Q8AZJ8	HLA-A3
RYSIFFDY	EBNA3A nuclear protein	Q8AZJ8	HLA-A24
QAKWRLQTL	EBNA3A nuclear protein	Q8AZJ8	HLA-B8
SVRDRLARL	EBNA3A nuclear protein	Q8AZJ8	HLA-A*02:01
AYSSWMYSY	EBNA3A nuclear protein	Q8AZJ8	HLA-A30
RPPIFIRRLH	EBNA3A nuclear protein	Q8AZJ8	HLA-B7
VEITPYKPTW	EBNA3B (EBNA4A) latent protein	CAA24858.1	HLA-B44
IVTDFSVIK	EBNA-3B nuclear protein	CAD53420.1	HLA-A11
VSFIEFVGW	EBNA-3B nuclear protein	CAD53420.1	HLA-B58
EGGVGWRHW	EBNA3C latent protein	CAD53421.1	HLA-B44
QPRAPIRPI	EBNA3C latent protein	CAD53421.1	HLA-B*07:02
EENLLDFVRF	EBNA3C latent protein	CAD53421.1	HLA-B44
QPRAPIRPIPT	EBNA3C latent protein	CAD53421.1	HLA-B7
RRIYDLIEL	EBNA3C latent protein	CAD53421.1	HLA-B*27:05
RPPIFIRRL	Epstein-Barr nuclear antigen 3	P12977.1	HLA-B7
YPLHEQHGM	Epstein-Barr nuclear antigen 3	P12977.1	HLA-B35
RPPIFIRLL	Epstein-Barr nuclear antigen 3	SRC279942	HLA-B7
AVFDRKSDAK	Epstein-Barr nuclear antigen 4	P03203.3	HLA-A11
LLDFVRFMGV	Epstein-Barr nuclear antigen 6	P03204.1	HLA-A*02:01
FLDKGTYTL	Glycoprotein GP110 precursor	P03188.1	HLA-A*02:01
SLVIVTTFV	Glycoprotein GP85 precursor	P03231.1	HLA-A*02:01
LMIIPLINV	Glycoprotein GP85 precursor	P03231.1	HLA-A2
TLFIGSHVV	Glycoprotein GP85 precursor	P03231.1	HLA-A2
YLQQNWWTL	latent membrane protein 1	AAS99606.1	HLA-A*02:01
ALLVLYSFA	latent membrane protein 1	AAS99606.1	HLA-A2
CLGGLLTMV	Latent membrane protein 2	P13285.1	HLA-A2
LLSAWILTA	Latent membrane protein 2	Q69135	HLA-A*02:03
LLWTLVVLL	latent membrane protein 2	AAB59844.1	HLA-A2
GLGTLGAAL	latent membrane protein 2	AAB59844.1	HLA-A2
MGSLEMVPM	Latent membrane protein 2	P0C729.1	HLA-B*35:01
YLLEMLWRL	LMP1 protein (Epstein-Barr virus, putative LYDMA gene)	Q777A4	HLA-A2
ARYAYYLQF	Major DNA-binding protein	P03227.1	HLA-B*27:05
VLQWASLAV	Major outer envelope glycoprotein gp350	Q66537	HLA-A*02:01
SSCSSCPLSKI	membrane protein	AAA45887.1	HLA-A11
TYGPVFMCL	membrane protein	AAA45887.1	HLA-A24
RRRWRRLTV	membrane protein	AAA45887.1	HLA-B27
VMSNTLLSAW	membrane protein	AAA45887.1	HLA-A25
FLYALALLL	membrane protein	AAA45887.1	HLA-A*02:01
CPLSKILL	membrane protein	AAA45887.1	HLA-B8
IEDPPFNSL	membrane protein	AAA45887.1	HLA-B60
PYLFWLAAIA	membrane protein	AAA45887.1	HLA-A23
GVFVYGGSKTSLYNL	nuclear antigen EBNA-1	AAA67277.1	HLA class I
FLRGRAYGL	nuclear antigen EBNA-3	AAB20988.1	HLA-B8
QNGALAINTF	Nuclear antigen EBNA-3C	Q69140.1	HLA-B62
DTPLIPLTIF	nuclear protein EBNA2	AAA45903.1	HLA-A2
RRRKGWIPL	Probable membrane glycoprotein precursor	P03218.1	HLA-B*27:05
RAKFKQLL	Trans-activator protein BZLF1	P03206.2	HLA-B*08:01
LQHYREVAA	Trans-activator protein BZLF1	P03206.2	HLA-C*08:02
EPLPQGQLTAY	Trans-activator protein BZLF1	P03206.2	HLA-B35
YVLDHLIVV	Transcription activator BRLF1	P03209.1	HLA-A*02:01
RVRAYTYSK	Transcription activator BRLF1	P03209.1	HLA-A*03:01
AENAGNDAC	Transcription activator BRLF1	P03209.1	HLA-B*45:01
IACPIVMRYVLDHLI	Transcription activator BRLF1	P03209.1	HLA-A*24:02
RALIKTLPRASYSSH	Transcription activator BRLF1	P03209.1	HLA-A2
GLCTLVAML	Transcriptional regulator IE63 homolog	Q04360.1	HLA-A*02:01
KDTWLDARM	Transcriptional regulator IE63 homolog	Q04360.1	HLA class I
DEVEFLGHY	Transcriptional regulator IE63 homolog	Q04360.1	HLA-B18

## Sheet: Table S1B. CD4 epitopes
Table S1B: EBV-specific CD4 T cell epitopes elicited in the course of a natural infection by EBV
Epitope	Antigen ID	Antigen name	Experimental HLA-II restriction
SRDELLHTRAASLLY	AFJ06848.1	BaRF1	HLA-DRB1*07:01
MLGQDDFIKFKSPLV	AFJ06841.1	BFRF1	HLA-DRB1*07:01
VKLTMEYDDKVSKSH	YP_401657.1	BMRF1	HLA-DRB1*03:01
LEKQLFYYIGTMLPNTRPHS	YP_401700.1	BXLF2	HLA-DR51
LTAYHVSTAPTGSWF	AAA66529.1	BZLF1	HLA-DRB3*02:02
AGLTLSLLVICSYLFISRG	P03182.1	Early antigen protein R	HLA-DR2
LDFNSVFLEIFHRGDPSLGR	P03182.1	Early antigen protein R	HLA-DR2
SRRFSWTLFLAGLTLSLLVI	P03182.1	Early antigen protein R	HLA-DR2
TSLYNLRRGTALAI	YP_401677.1	EBNA-1	HLA class II
VYGGSKTSLYNLRRGTALAI	Q777E1	EBNA-1 protein	HLA class II
GCKGTHGGTGAGAGAGGAG	Q777E1	EBNA-1 protein	HLA class II
PPVVRMFMRERQLPQ	CAD53421.1	EBNA3C latent protein	HLA class II
ILCFVMAARQRLQDI	CAD53421.1	EBNA3C latent protein	HLA class II
QQRPVMFVSRVPAKK	CAD53421.1	EBNA3C latent protein	HLA class II
QKRAAPPTVSPSDTG	CAD53421.1	EBNA3C latent protein	HLA class II
PRSPTVFYNIPPMPLPPSQL	P12978.1	Epstein-Barr nuclear antigen 2	HLA-DRB3*02:02,HLA-DRB1*07:01
PAQPPPGVINDQQLHHLPSG	P12978.1	Epstein-Barr nuclear antigen 2	HLA-DRB1*03:01
KTSLYNLRRGIALAIPQCRL	AAA67275.1	nuclear antigen EBNA-1	HLA class II
PTCNIKATVCSFDDGVDLPP	AAA67275.1	nuclear antigen EBNA-1	HLA class II
TVFYNIPPMPL	AAA45903.1	nuclear protein EBNA2	HLA class II
QHYREVAAAKSSE	P03206.2	Trans-activator protein BZLF1	HLA-DR1

## Sheet: Table S1C. B epitopes
Table S1C: EBV-specific B cell epitopes linked to human diseases
Epitope	Antigen ID	Antigen name	Disease	PMID
KSQGERSWTWRKEAH	SRC248435	Alternate genetic product	multiple sclerosis	26831522
VSGFISFFKNPFGGM	ABB89287.1	BALF4	DND	9276728
TGGVYHFVKKHVHES	CEQ38174.1	BALF5	multiple sclerosis	26831522
GTGALASSAPST	CEQ35232.1	BFRF3	multiple sclerosis	26831522
SAGTGALASSAP	CEQ35232.1	BFRF3	multiple sclerosis	26831522
SSAPSTAVAQSA	CEQ35232.1	BFRF3	multiple sclerosis	26831522
NQNNLPNDVFRE	CEQ35232.1	BFRF3	multiple sclerosis	26831522
NNLPNDVFREAQ	CEQ35232.1	BFRF3	multiple sclerosis	26831522
NLPNDVFREAQR	CEQ35232.1	BFRF3	multiple sclerosis	26831522
GALASSAPSTAV	CEQ35232.1	BFRF3	multiple sclerosis	26831522
LPNDVFREAQRS	CEQ35232.1	BFRF3	multiple sclerosis	26831522
TGALASSAPSTA	CEQ35232.1	BFRF3	multiple sclerosis	26831522
PNDVFREAQRSY	CEQ35232.1	BFRF3	multiple sclerosis	26831522
QNNLPNDVFREA	CEQ35232.1	BFRF3	multiple sclerosis	26831522
ASSAPSTAVAQS	CEQ35232.1	BFRF3	multiple sclerosis	26831522
QVSLESVDVYFQDVFGTMWC	CEQ43370.1	BLLF1	multiple sclerosis	26831522
TNTTDITYVGD	CEQ43370.1	BLLF1	multiple sclerosis	26831522
YVFYSGNGPKASGGDYCIQS	CEQ43370.1	BLLF1	multiple sclerosis	26831522
KTEMLGNEIDIECIM	CEQ37797.1	BLLF1	multiple sclerosis	26831522
DYGGDSTTPRPRYNATTYLP	CEQ37797.1	BLLF1	multiple sclerosis	26831522
PSTSSKLRPRWTFTSPPVTT	CEQ37962.1	BLLF1	multiple sclerosis	26831522
GLCTLVAML	CAD53409.1	BMLF1 protein	DND	16237088
PVFIPAPR	YP_401653.1	BOLF1	DND	7878031
VPVLAFDAARLRLLE	YP_401653.1	BOLF1	multiple sclerosis	10491006
AAVPVLAFDAARLRLLE	AFJ06845.2	BOLF1	DND	25392335
QAPLPCVLWPVLPEPLPQGQLT	AAA66529.1	BZLF1	DND	7750123
TVQTAAAVVFACPGANQGQQLA	AAA66529.1	BZLF1	DND	7750123
HVSTAPTGSWFSAPQPAPENAY	AAA66529.1	BZLF1	DND	7750123
EDVKFTPDPYQVPFVQAFDQAT	AAA66529.1	BZLF1	DND	7750123
SWFSAPQPAPENAYQAYAAPQL	AAA66529.1	BZLF1	DND	7750123
APENAYQAYAAPQLFPVSDITQ	AAA66529.1	BZLF1	DND	7750123
QTNQAGGEAPQPGDNSTVQTAA	AAA66529.1	BZLF1	DND	7750123
YAAPQLFPVSDITQNQQTNQAG	AAA66529.1	BZLF1	DND	7750123
FTPDPYQVPF	AAA66529.1	BZLF1	DND	7750123
AAPARRTRKPQQPESLEECDSE	AAA66529.1	BZLF1	DND	7750123
VFACPGANQGQQLADIGVPQPA	AAA66529.1	BZLF1	DND	7750123
GVPQPAPVAAPARRTRKPQQPE	AAA66529.1	BZLF1	DND	7750123
QGQQLADIGVPQPAPVAAPARR	AAA66529.1	BZLF1	DND	7750123
MMDPNSTSEDVKFTPDPYQVPF	AAA66529.1	BZLF1	DND	8705686
PQGQLTAYHVSTAPTGSWFSAP	AAA66529.1	BZLF1	DND	7750123
AFDQATRVYQDLGGPSQAPLPC	AAA66529.1	BZLF1	DND	7750123
EECDSELEIKRYKNRVASRKCR	AAA66529.1	BZLF1	DND	7750123
WPVLPEPLPQGQLTAYHVSTAP	AAA66529.1	BZLF1	DND	7750123
IKRYKNRVASRKCRAKFKQLLQ	AAA66529.1	BZLF1	DND	7750123
VSDITQNQQTNQAGGEAPQPGD	AAA66529.1	BZLF1	DND	7750123
KPQQPESLEECDSELEIKRYKN	AAA66529.1	BZLF1	DND	7750123
STAVAQSATPSVSSSISSLRAATSGATAAA	P14348.1	Capsid protein VP26	DND	8014488
AVDTGSGGGGQPHDTAPRGARKKQ	P14348.1	Capsid protein VP26	DND	12121125
RLPKPTLQGRLEADF	P14348.1	Capsid protein VP26	DND	24798244
ADFPDSPLLPKFQEL	P14348.1	Capsid protein VP26	DND	24798244
HQQGGWSTLIEDNIP	P03182.1	Early antigen protein R	DND	7678829
ETFTETWNRFITHTE	P03182.1	Early antigen protein R	DND	7678829
GMLEASEGLDGWIHQ	P03182.1	Early antigen protein R	DND	7678829
SSSSAGGGGGGAGGGGGGGGSGG	SRC250745	early phosphoprotein P34	DND	7533789
IHSDEGPGTGPGNGLGE	SRC292621	EBNA-1	multiple sclerosis	26831522
GGDNHGRGRGRGRGRGGGRPGAPG + CITR(R13,R15)	ABB89251.1	EBNA-1	DND	16508937
AGAGGGAGGAGAGGGAGGAGA	YP_401677.1	EBNA-1	rheumatoid arthritis	1722966
PGRRPFFHPVGEAD	AFY97913.1	EBNA-1	DND	24642384
GGDNHGRGRGRGRGRGGGRPGAPG + CITR(R7, R9, R11, R13, R15, R19)	ABB89251.1	EBNA-1	DND	16508937
GGDNHGRGRGRGRGRGGGRPGAPG + CITR(R15)	ABB89251.1	EBNA-1	DND	16508937
GGAGAGGGAGAGGGAG	ABB89251.1	EBNA-1	healthy	16385527
GPAGPRGGGRGRGRGRGRGHNDGG + CITR(R7, R11, R13, R15, R17, R19)	SRC292621	EBNA-1	rheumatoid arthritis	25407647
GGDNHGRGRGRGRGRGGGRPGAPG + CITR(R11, R15)	ABB89251.1	EBNA-1	DND	16508937
SGSPPRRPPPGRRPFFHPVG	Q777E1	EBNA-1 protein	multiple sclerosis	19733917
GGAGAGGAGAGGAGAGGAGAG	Q777E1	EBNA-1 protein	DND	2981091
GGPDGEPDVPPGAIEQGPAD	Q777E1	EBNA-1 protein	multiple sclerosis	19733917
GDEGGDGDEGEEGQE	Q777E1	EBNA-1 protein	DND	2444542
GGGAGAGGAGAGGGGR	Q777E1	EBNA-1 protein	DND	2981091
GGPDGEPDVPPGAIEQGPADDPGEGPSTG	Q777E1	EBNA-1 protein	multiple sclerosis	19733917
GCKGTHGGTGAGAGAGGAGA	Q777E1	EBNA-1 protein	multiple sclerosis	19733917
KGTHGGTGAGAGAGGAGAG	Q777E1	EBNA-1 protein	DND	2981091
AGAGGGAGGAGAGGGAGGAGG	Q777E1	EBNA-1 protein	DND	20638898
GGSGGRRGRGRERARGGSRERA	Q777E1	EBNA-1 protein	DND	20638898
SSQSSSSGSPPRRPPPGRRPFFHPVGEADYFEYHQE	Q777E1	EBNA-1 protein	multiple sclerosis	19733917
RGQGDGGRRKKGG	Q777E1	EBNA-1 protein	DND	2164400
GNGLGEKGDTSGPEGSGGSG	Q777E1	EBNA-1 protein	multiple sclerosis	19733917
KGGWFGKHRGQGGS	Q777E1	EBNA-1 protein	DND	2164400
PQRRGGDNHGRGRGRGRGRG	Q777E1	EBNA-1 protein	multiple sclerosis	19733917
DPGEGPSTGPRGQGDGGRRK	Q777E1	EBNA-1 protein	multiple sclerosis	19733917
GRRPFFHPVGEADYFEYHQE	Q777E1	EBNA-1 protein	multiple sclerosis	19733917
GRRPFFHPVGE	Q777E1	EBNA-1 protein	DND	21757535
RGRGRGRGRGGGRPGAPGGS	Q777E1	EBNA-1 protein	multiple sclerosis	19733917
PGAIEQGPADDPGEGPSTGP	Q777E1	EBNA-1 protein	multiple sclerosis	19733917
PPRRPPPGRRPFFHPVGEADYFEYHQE	Q777E1	EBNA-1 protein	DND	20638898
GGRPGAPGGSGSGPRHRDGV	Q777E1	EBNA-1 protein	multiple sclerosis	19733917
GEADYFEYHQEGGPDGEPDVPPGAIEQGPAD	Q777E1	EBNA-1 protein	multiple sclerosis	19733917
GSGPRHRDGVRRPQKRPSCIGCKGTHGGTG	Q777E1	EBNA-1 protein	multiple sclerosis	19733917
EADYFEYHQEGGPDGEPDVP	Q777E1	EBNA-1 protein	multiple sclerosis	19733917
RRGRGRERARGGSRE	Q777E1	EBNA-1 protein	DND	2164400
GSGPRHRDGVRRPQKRPSCI	Q777E1	EBNA-1 protein	multiple sclerosis	19733917
RARGRGRGRGEKRP	Q777E1	EBNA-1 protein	DND	2444542
RRPQKRPSCIGCKGTHGGTG	Q777E1	EBNA-1 protein	multiple sclerosis	19733917
GGAGGAGGAGAGGGAG	Q777E1	EBNA-1 protein	DND	2981091
QGPADDPGEGPSTGPRGQGDGGRRKK	Q777E1	EBNA-1 protein	DND	20638898
AGGAGAGGGAGGA	Q777E1	EBNA-1 protein	DND	2981091
RPRSPSSQSSSSGSPPRRP	Q777E1	EBNA-1 protein	DND	2164400
RGGSGGRGRGGSGG	Q777E1	EBNA-1 protein	DND	2164400
DGEPDVPPGAIEQGPADDPGEGPSTGPR	Q777E1	EBNA-1 protein	DND	20638898
MSDEGPGTGPGNGLGEKGDT	Q777E1	EBNA-1 protein	multiple sclerosis	19733917
GGAGAGGGAGGAGAGGGAGGAG	Q777E1	EBNA-1 protein	DND	2164400
PPRPTRPTTLPPTPLLT	CEQ43349.1	EBNA-2	multiple sclerosis	26831522
EDYVEGPSKRPRPSIQ	CEQ43349.1	EBNA-2	multiple sclerosis	26831522
GAGAGAGAFLRGRAYGL	SRC292631	EBNA-3B	multiple sclerosis	26831522
PRHGHSQGPWKPWSA	YP_001129465.1	EBNA-3C	systemic lupus erythematosus	15894513
GPPAA	CAD53421.1	EBNA3C latent protein	DND	7508347
GPPAAGPPAAGPPAA	CAD53421.1	EBNA3C latent protein	DND	7508347
SVKTEMLGNEID (S194,V195, K196, T197, E198, M199, L200, G201, N202, E203, I204, D205)	P03200.1	Envelope glycoprotein GP340/GP220 (Membrane antigen) (MA)	DND	25694592
QNPVYLIPETVPYIKWDN (Q144, N145, P146, V147, Y148, L149, I150, P151, E152, T153, V154, P155, Y156, I157, K158, W159, D160, N161)	P68343.1	Envelope glycoprotein GP350	DND	25694592
PQRRGGDNHGRGRGRGRGRG + CITR(R17)	P03211.1	Epstein-Barr nuclear antigen 1	DND	26796582
RGRGRGRGRGGGRPGAPGGS + CITR(R5)	P03211.1	Epstein-Barr nuclear antigen 1	DND	26796582
AGAGGGAGGAGGAGG	P03211.1	Epstein-Barr nuclear antigen 1	DND	24798244
GRGRGRGRGRGGGRG + CITR(R2, R4, R6, R8, R14)	SRC279943	Epstein-Barr nuclear antigen 1	rheumatoid arthritis	21413944
GAGAGGGGRGRGGSGGRGRG + CITR(R17)	P03211.1	Epstein-Barr nuclear antigen 1	DND	26796582
GSGGRGRGGSGGRRGRGRER + CITR(R7)	P03211.1	Epstein-Barr nuclear antigen 1	DND	26796582
GGRRGRGRERARGGSRERAR + CITR(R12)	P03211.1	Epstein-Barr nuclear antigen 1	DND	26796582
GGRRGRGRERARGGSRERAR + CITR(R6)	P03211.1	Epstein-Barr nuclear antigen 1	DND	26796582
GGRRGRGRERARGGSRERAR + CITR(R4)	P03211.1	Epstein-Barr nuclear antigen 1	DND	26796582
RGGSGGRGRGGSGGRGRGGS + CITR(R1)	P03211.1	Epstein-Barr nuclear antigen 1	DND	26796582
GSGGRGRGGSGGRRGRGRER + CITR(R14)	P03211.1	Epstein-Barr nuclear antigen 1	DND	26796582
GTWVAGVFVYGGSKTSLYNL	P03211.1	Epstein-Barr nuclear antigen 1	DND	26796582
IAEGLRALLARSHVERTTDE	P03211.1	Epstein-Barr nuclear antigen 1	DND	26796582
PQRRGGDNHGRGRGRGRGRG + CITR(R19)	P03211.1	Epstein-Barr nuclear antigen 1	DND	26796582
ARGGSRERARGRGRGRGEKR + CITR(R2)	P03211.1	Epstein-Barr nuclear antigen 1	DND	26796582
GDDGDDGDEGGDGDE	Q3KSS4.1	Epstein-Barr nuclear antigen 1	systemic lupus erythematosus	7533789
DPGEGPSTGPRGQGDGGRRK + CITR(R11)	P03211.1	Epstein-Barr nuclear antigen 1	DND	26796582
GPQRR	Q3KSS4.1	Epstein-Barr nuclear antigen 1	systemic scleroderma	11862315
RGRGRGRGRGGGRPGAPGGS + CITR(R9)	P03211.1	Epstein-Barr nuclear antigen 1	DND	26796582
RRGTALAIPQCRLTPLSRLP + CITR(R2)	P03211.1	Epstein-Barr nuclear antigen 1	DND	26796582
GSGGRGRGGSGGRRGRGRER + CITR(R5)	P03211.1	Epstein-Barr nuclear antigen 1	DND	26796582
AGAGAGGAGAGGAGAGGGAG	P03211.1	Epstein-Barr nuclear antigen 1	DND	26796582
CKGTHGGTGAGAGAGGAGAG	P03211.1	Epstein-Barr nuclear antigen 1	nasopharyngeal carcinoma	1719023
DDGVDLPPWFPPMVEGAAAE	P03211.1	Epstein-Barr nuclear antigen 1	DND	26796582
AGAGGGAGGAGAGGGAGGAGC	SRC279943	Epstein-Barr nuclear antigen 1	viral infection	7533789
RRPFFHPVGEADYFEYHQEG	P03211.1	Epstein-Barr nuclear antigen 1	nasopharyngeal carcinoma	1719023
AGAGGGAGAGGAGGA	P03211.1	Epstein-Barr nuclear antigen 1	DND	24798244
RGRGRGRGRGGGRPGAPGGS + CITR(R1)	P03211.1	Epstein-Barr nuclear antigen 1	DND	26796582
PQRRGGDNHGRGRGRGRGRG + CITR(R13)	P03211.1	Epstein-Barr nuclear antigen 1	DND	26796582
GRGRGRGEKRPRSPSSQSSS + CITR(R2)	P03211.1	Epstein-Barr nuclear antigen 1	DND	26796582
GGAGAGGGAGAGG	Q3KSS4.1	Epstein-Barr nuclear antigen 1	healthy	16385527
RGGSGGRGRGGSGGRGRGGS + CITR(R7)	P03211.1	Epstein-Barr nuclear antigen 1	DND	26796582
APGPGPQPGPLRESI	P03211.1	Epstein-Barr nuclear antigen 1	DND	24798244
PQRRGGDNHGRGRGRGRGRG + CITR(R4)	P03211.1	Epstein-Barr nuclear antigen 1	DND	26796582
GAGAGGGGRGRGGSGGRGRG + CITR(R11)	P03211.1	Epstein-Barr nuclear antigen 1	DND	26796582
GGDNHGRGRGRGRGRGGGRPGAPG	Q3KSS4.1	Epstein-Barr nuclear antigen 1	DND	23379431
SGPRHRDGVRRPQKRPSCIG	P03211.1	Epstein-Barr nuclear antigen 1	healthy	1719023
GSGGRGRGGSGGRRGRGRER + CITR(R16)	P03211.1	Epstein-Barr nuclear antigen 1	DND	26796582
RGGSGGRGRGGSGGRGRGGS + CITR(R17)	P03211.1	Epstein-Barr nuclear antigen 1	DND	26796582
GRPGAPGGSGSGPRHRDGVR	P03211.1	Epstein-Barr nuclear antigen 1	nasopharyngeal carcinoma	1719023
GRGRERARGGSRERA	P03211.1	Epstein-Barr nuclear antigen 1	DND	24798244
TWVAGVFVYGGSKTSLYNLR	P03211.1	Epstein-Barr nuclear antigen 1	healthy	1719023
AGAGGGAGAGGGAGG	P03211.1	Epstein-Barr nuclear antigen 1	DND	24798244
QGGSNPKFENIAEGLRALLA	P03211.1	Epstein-Barr nuclear antigen 1	DND	26796582
PRSPSSQSSSSGSPPRRPPP	P03211.1	Epstein-Barr nuclear antigen 1	DND	26796582
AGGGAGGAGAGGGAG	P03211.1	Epstein-Barr nuclear antigen 1	DND	24798244
GDDGDDGDEGGDGDEGEEGQE	P03211.1	Epstein-Barr nuclear antigen 1	DND	26796582
AGGAGAGGGAGAGGA	P03211.1	Epstein-Barr nuclear antigen 1	DND	24798244
SGPEGSGGSGPQRRGGDNHG + CITR(R14)	P03211.1	Epstein-Barr nuclear antigen 1	DND	26796582
AGAGGGAGGAGGAGA	P03211.1	Epstein-Barr nuclear antigen 1	DND	24798244
AEVLKDAIKDLVMTKPAPTC	P03211.1	Epstein-Barr nuclear antigen 1	nasopharyngeal carcinoma	1719023
RGRGRGRGRGGGRPGAPGGS + CITR(R3)	P03211.1	Epstein-Barr nuclear antigen 1	DND	26796582
AGGAGAGGAGGAGAG	P03211.1	Epstein-Barr nuclear antigen 1	DND	24798244
GGSGPQRRGG	Q3KSS4.1	Epstein-Barr nuclear antigen 1	systemic scleroderma	11862315
GRGRGRGEKRPRSPSSQSSS + CITR(R6)	P03211.1	Epstein-Barr nuclear antigen 1	DND	26796582
PPPGRRPFFHPVGE	P03211.1	Epstein-Barr nuclear antigen 1	viral infection	12696112
AGAGGGAGGAGAGGGAGGAG	P03211.1	Epstein-Barr nuclear antigen 1	rheumatoid arthritis	7519956
GAGGGAGAGGAGAGGGGRGR	P03211.1	Epstein-Barr nuclear antigen 1	nasopharyngeal carcinoma	1719023
RGGSGGRGRGGSGGRGRGGS + CITR(R15)	P03211.1	Epstein-Barr nuclear antigen 1	DND	26796582
AGGAGAGGAGAGGAG	P03211.1	Epstein-Barr nuclear antigen 1	DND	24798244
PGEGPSTGPRGQGDGGRRKK	P03211.1	Epstein-Barr nuclear antigen 1	healthy	1719023
PPMVEGAAAEGDDGDDGDEG	P03211.1	Epstein-Barr nuclear antigen 1	DND	26796582
AGAGGGAGGAGAGGG	P03211.1	Epstein-Barr nuclear antigen 1	DND	24798244
GAGAGGGGRGRGGSGGRGRG + CITR(R9)	P03211.1	Epstein-Barr nuclear antigen 1	DND	26796582
GGGAGGAGAGGGAGG	P03211.1	Epstein-Barr nuclear antigen 1	DND	24798244
AGGAGAGGGAGGAGG	P03211.1	Epstein-Barr nuclear antigen 1	DND	24798244
GAGGAGAGGGAGGAG	P03211.1	Epstein-Barr nuclear antigen 1	DND	24798244
CNIRVTVCSFDDGVDLPPWF	P03211.1	Epstein-Barr nuclear antigen 1	DND	26796582
GAGAGGGAGGAGAGG	P03211.1	Epstein-Barr nuclear antigen 1	DND	24798244
GSPPRRPPPGRRPFFHPVGE	P03211.1	Epstein-Barr nuclear antigen 1	nasopharyngeal carcinoma	1719023
GAGGGAGGAGAGGGAGGAGA	P03211.1	Epstein-Barr nuclear antigen 1	DND	2481875
RGRGRGRGRGGGRPGAPGGS + CITR(R7)	P03211.1	Epstein-Barr nuclear antigen 1	DND	26796582
RGGSRERARGRGRGRGEKRP	P03211.1	Epstein-Barr nuclear antigen 1	healthy	1719023
GRGRGRGEKRPRSPSSQSSS + CITR(R4)	P03211.1	Epstein-Barr nuclear antigen 1	DND	26796582
GGSKTSLYNLRRGTALAIPQ + CITR(R12)	P03211.1	Epstein-Barr nuclear antigen 1	DND	26796582
ARGGSRERARGRGRGRGEKR + CITR(R16)	P03211.1	Epstein-Barr nuclear antigen 1	DND	26796582
KRPRSPSSQSSSSGS	P03211.1	Epstein-Barr nuclear antigen 1	DND	24798244
RPQKRPSCIGCKGTHGGTGA	P03211.1	Epstein-Barr nuclear antigen 1	nasopharyngeal carcinoma	1719023
ARGGSRERARGRGRGRGEKR + CITR(R12)	P03211.1	Epstein-Barr nuclear antigen 1	DND	26796582
RGGSGGRGRGGSGGRGRGGS + CITR(R9)	P03211.1	Epstein-Barr nuclear antigen 1	DND	26796582
GAGAGGGGRGRGGSGGRGRG + CITR(R19)	P03211.1	Epstein-Barr nuclear antigen 1	DND	26796582
GGGAGGAGAGGGAGGAG	P03211.1	Epstein-Barr nuclear antigen 1	DND	6096700
PQRRGGDNHGRGRGRGRGRG + CITR(R15)	P03211.1	Epstein-Barr nuclear antigen 1	DND	26796582
GRGRGRGRGRGGRG	SRC279943	Epstein-Barr nuclear antigen 1	systemic lupus erythematosus	16385527
RGRGRGEKRPRSPSSQSSSS	P03211.1	Epstein-Barr nuclear antigen 1	nasopharyngeal carcinoma	1719023
GGSGGRGRGGSGGRGRGGSG	P03211.1	Epstein-Barr nuclear antigen 1	nasopharyngeal carcinoma	1719023
PPPGRRP	Q3KSS4.1	Epstein-Barr nuclear antigen 1	systemic lupus erythematosus	7554555
SSQSSSSGSPPRRPP	P03211.1	Epstein-Barr nuclear antigen 1	DND	24798244
ARGGSRERARGRGRGRGEKR + CITR(R14)	P03211.1	Epstein-Barr nuclear antigen 1	DND	26796582
GQSRGQSRGRGRGRGRGRGKG + CITR(R4, R8, R11, R12, R14, R16, R18)	P12978.1	Epstein-Barr nuclear antigen 2	DND	27255888
DVVRAPGVPAMQPQY	P12977.2	Epstein-Barr nuclear antigen 3	DND	24798244
RTPEWPVQGEGGQNV	P12977.2	Epstein-Barr nuclear antigen 3	DND	24798244
VPKPRPEVPQSDETA	P12977.2	Epstein-Barr nuclear antigen 3	DND	24798244
DLSIHGRPCPQAPEW	P12977.2	Epstein-Barr nuclear antigen 3	DND	24798244
FDLPLIQPISQGAPV	P12977.2	Epstein-Barr nuclear antigen 3	DND	24798244
RKRVDHDAGGSAPAR	P12977.2	Epstein-Barr nuclear antigen 3	DND	24798244
EQGKEVLEKARGSTY	P12977.2	Epstein-Barr nuclear antigen 3	DND	24798244
KQILRQLLTGGVKKG	P03203.3	Epstein-Barr nuclear antigen 4	DND	24798244
QARLEPWQPLPGPQV	P03203.3	Epstein-Barr nuclear antigen 4	DND	24798244
QWAPATMQTPPRAPT	P03203.3	Epstein-Barr nuclear antigen 4	DND	24798244
LSVQARLEPWQPLPG	P03203.3	Epstein-Barr nuclear antigen 4	DND	24798244
PRAGRRGPCVFTGDL	P03203.3	Epstein-Barr nuclear antigen 4	DND	24798244
QPSQTPDDPTKQSRP	P03203.3	Epstein-Barr nuclear antigen 4	DND	24798244
PPAVGPPAAGPPAAGPPAAG	P03204.1	Epstein-Barr nuclear antigen 6	DND	7595412
QEPPAPQAPYQGYQEPPPPQ	P03204.1	Epstein-Barr nuclear antigen 6	DND	7595412
GHGQDQVSQFPHLQS	P03204.1	Epstein-Barr nuclear antigen 6	DND	24798244
RLQDIRRGPLVAEGG	P03204.1	Epstein-Barr nuclear antigen 6	DND	24798244
PAPQAPYQGYQEPPAPQAPY	P03204.1	Epstein-Barr nuclear antigen 6	healthy	10700463
QGYQEPPPPQAPYQGYQEPP	P03204.1	Epstein-Barr nuclear antigen 6	DND	7595412
PPAAGPRILAPLSAGPPAAG	P03204.1	Epstein-Barr nuclear antigen 6	DND	7595412
PHIVTPPSARPRIMAPPVVR	P03204.1	Epstein-Barr nuclear antigen 6	DND	7595412
DPRAPHLPPQWDGSA	P03204.1	Epstein-Barr nuclear antigen 6	DND	24798244
PPAAGPPAAGPPAAGPPAAG	P03204.1	Epstein-Barr nuclear antigen 6	DND	7595412
PLSAGPPAAGPHIVTPPSAR	P03204.1	Epstein-Barr nuclear antigen 6	DND	7595412
HTQGPWDPRAPHLPP	P03204.1	Epstein-Barr nuclear antigen 6	DND	24798244
PIPTRFPPPPMPLQDSMAVG	P03204.1	Epstein-Barr nuclear antigen 6	DND	7595412
DIRRGPLVAEGGVGW	P03204.1	Epstein-Barr nuclear antigen 6	DND	24798244
VMDAGKAQPIESSHL	P03204.1	Epstein-Barr nuclear antigen 6	DND	24798244
PPAAGPPAAGPPAAGPRILA	P03204.1	Epstein-Barr nuclear antigen 6	DND	7595412
QKRAAQRAAGPSVAS	P03188.1	Glycoprotein GP110 precursor	rheumatoid arthritis	9239413
SGSGGDDDDPHGPVQ	P03230.1	Latent membrane protein 1	DND	24798244
TLNLT	P13285.1	Latent membrane protein 2	viral infection	21668364
KSLSSTEFIPN	P13285.1	Latent membrane protein 2	viral infection	21668364
RIEDPPFNSLL	P13285.1	Latent membrane protein 2	viral infection	21668364
DPVGHPAAPRAPGPE	YP_401707.1	LF3	systemic lupus erythematosus	15894513
DPLPQDPDNTDDNGPQDPDNTDDNGPH	YP_401722.1	LMP-1	infectious mononucleosis	27218119
GPQDPDNTDDNGPHDPLPHSPSDSAGNDG	YP_401722.1	LMP-1	Hodgkin's lymphoma	27218119
QDPDNTDDNGPQDPDNTD	AHI43005.1	LMP-1	DND	26831522
VPTIAHGDGRRPSKQRTFI	P03226.1	Major capsid protein	viral infection	1703730
SPPEWLK	P03227.1	Major DNA-binding protein	systemic lupus erythematosus	12727642
SKAPESTTTSPTLNTTGFADY	SRC298290	major outer envelope glycoprotein gp220	DND	25694592
CLTWRIEDPPFNSLLFALLAAAGGLQGIYVLVMLVLLI	AAA45887.1	membrane protein	viral infection	25864917
GGDNHGRGRGRGRGRGGGRPGAPG + CITR(R7, R9, R11, R13, R19)	NP_039875.1	nuclear antigen EBNA1	DND	27255888
FLRGRAYGL	AAB20988.1	nuclear antigen EBNA-3	DND	18032491
GQSRGQSRGRGRGRGRGRGKG + CITR(R4, R8, R10, R12, R14, R16, R18)	AAA45903.1	nuclear protein EBNA2	rheumatoid arthritis	21413944
GQSRGQSRG + CITR(R4, R8)	AAA45903.1	nuclear protein EBNA2	rheumatoid arthritis	21413944
PPPPPPPPPPPPPPPPPPPP	AAA45903.1	nuclear protein EBNA2	DND	2444542
LSERIVRDGLFNSQFIALMPTSGCAQVTGCSDA	CAD53405.1	ribonucleoside-diphosphate reductase large chain	DND	10502273
TIVVPEPM	CAD53451.1	thymidine kinase	DND	7878031
