# Supplementary material for: Computer-Aided Design of an Epitope-Based Vaccine against Epstein-Barr Virus
Source: J Immunol Res. 2017 Sep 28;2017:9363750. doi: 10.1155/2017/9363750 (PMC5651165; doi:10.1155/2017/9363750)
Supplement: Supplementary file 2 [file 9363750.f2.xls]

## Sheet: Table S2A. cons. CD8 epitopes
Table S2A: Conserved EBV-specific CD8 T cell epitopes recognized in the course of a natural infection by EBV
Epitope	Antigen name	Antigen ID	Viral gene	Dev. Stage(1)	Experimental HLA-I restriction	Subcellular localization(1)	Function(1)	BLAST HIT HMP (%)(2)	BLAST HIT HUMAN (%)(3)
CYDHAQTHL	DNA polymerase processivity factor BMRF1	P03191	BMRF1	E	A2402	Virion tegument/Host cell nucleus	Viral lytic DNA replication role	EFF75621.1 (77.78)	CAH10644.1 (66.67)
TLDYKPLSV	DNA polymerase processivity factor BMRF1	P03191	BMRF1	E	A0201	Virion tegument/Host cell nucleus	Viral lytic DNA replication role	EEX52148.1 (77.78)	CCQ43211.1 (55.56)
YRSGIIAVV	DNA polymerase processivity factor BMRF1	P03191	BMRF1	E	B3906 Cw6	Virion tegument/Host cell nucleus	Viral lytic DNA replication role	OFQ99895.1 (88.89)	BAC03504.1 (66.67)
FLDKGTYTL	Envelope glycoprotein B	P03188	gB BALF4	L	A0201	Viral envelope	Fusion of viral and host membranes	EGD34542.1 (88.89)	XP_011543352.1 (66.67)
VEDLFGANL	Envelope glycoprotein gL	AFY97944	gL BKRF2	L	B60	Viral envelope	Virion fusion to host cell	EKA92174.1 (77.78)	ABP98034.1 (66.67)
VLQWASLAV	Envelope glycoprotein gp350	Q66537	BLLF1	L	A0201A2	Viral envelope	Virion fusion to host cell	ERI88243.1 (77.78)	EAW50478.1 (77.78)
LMIIPLINV	Envelope glycoprotein H	P03231	gH BXBLF2	L	A2 A0201	Viral envelope	Fusion of viral and host membranes	AFN46801.1 (66.67)	EAX04605.1 (66.67)
SLVIVTTFV	Envelope glycoprotein H	P03231	gH BXBLF2	L	A0201 A2	Viral envelope	Fusion of viral and host membranes	NO_HIT (-)	EAX04605.1 (55.56)
TLFIGSHVV	Envelope glycoprotein H	P03231	gH BXBLF2	L	A2 A0201	Viral envelope	Fusion of viral and host membranes	OFL82736.1 (77.78)	AAX88962.1 (77.78)
FMVFLQTHI	Epstein-Barr nuclear antigen 1	Q777E1	EBNA1	E	A0201	Host nucleus	Viral DNA replication at latent stage	EEC96675.1 (77.78)	1ZL8 (66.67)
VLKDAIKDL	Epstein-Barr nuclear antigen 1	Q777E1	EBNA1	E	A0203	Host nucleus	Viral DNA replication at latent stage	KXB56071.1 (88.89)	EAX00446.1 (66.67)
AYSSWMYSY	Epstein-Barr nuclear antigen 3	Q8AZJ8	EBNA3	E	A30	Host nucleus matrix	Regulation of transcription	EKB85112.1 (77.78)	EAW88404.1 (66.67)
QAKWRLQTL	Epstein-Barr nuclear antigen 3	Q8AZJ8	EBNA3	E	B8	Host nucleus matrix	Regulation of transcription	EHR35488.1 (66.67)	XP_005255827.1 (77.78)
RLRAEAQVK	Epstein-Barr nuclear antigen 3	Q8AZJ8	EBNA3	E	A3 A0301	Host nucleus matrix	Regulation of transcription	NO_HIT (-)	XP_011507142.1 (77.78)
RPPIFIRRL	Epstein-Barr nuclear antigen 3	P12977	EBNA3	E	B7 B8 B0702	Host nucleus matrix	Regulation of transcription	EFI49553.1 (55.56)	NP_001182344.1 (66.67)
SVRDRLARL	Epstein-Barr nuclear antigen 3	Q8AZJ8	EBNA3	E	A0201	Host nucleus matrix	Regulation of transcription	NO_HIT (-)	3HR0 (55.56)
VSFIEFVGW	Epstein-Barr nuclear antigen 3	CAD53420	EBNA3	E	B58	Host nucleus matrix	Regulation of transcription	EDS21812.1 (77.78)	NP_997242.2 (55.55)
QPRAPIRPI	Epstein-Barr nuclear antigen 6	CAD53421	EBNA6	E	B0702	Host nucleus	Virus-hots interactions to B cells immortalization	EEZ70880.1 (66.67)	AFC01212.1 (55.56)
RRIYDLIEL	Epstein-Barr nuclear antigen 6	CAD53421	EBNA6	E	B2705	Host nucleus matrix	Regulation of transcription	EDS12420.1 (77.78)	EAW88480.1 (66.67)
RRRKGWIPL	Glycoprotein BILF2	P03218	BILF2	L	B2705	Membrane	-	KXO17735.1 (77.78)	AAC50593.1 (55.56)
YLQQNWWTL	Latent membrane protein 1	AAS99606	LMP1	L	A0201 A2	Host cell membrane	Oncogene	EHG11339.1 (77.78)	EAX03909.1 (55.56)
FLYALALLL	Latent membrane protein 2	AAA45887	LMP2	L	A0201 A2	Host cell membrane	Virus-hots interactions	NO_HIT (-)	BAG58906.1 (66.67)
GLGTLGAAL	Latent membrane protein 2	AAB59844	LMP2	L	A2	Host cell membrane	Virus-host interactions	EKA95736.1 (88.89)	NP_004442.3 (88.89)
LLSAWILTA	Latent membrane protein 2	Q69135	LMP2	L	A0203	Host cell membrane	Virus-host interactions	EFG30325.2 (77.78)	EAW74609.1 (66.67)
LLWTLVVLL	Latent membrane protein 2	AAB59844	LMP2	L	A2	Host cell membrane	Virus-host interactions	EPD61288.1 (77.78)	NP_055276.1 (77.78)
RRRWRRLTV	Latent membrane protein 2	AAA45887	LMP2	L	B27	Host cell membrane	Virus-hots interactions	EPH15974.1 (66.67)	BAC05321.1 (66.66)
ARYAYYLQF	Major DNA-binding protein	P03227	DBP	E	B2705	Host nucleus	Viral DNA replication	NO_HIT (-)	BAG60402.1 (66.66)
WQWEHIPPA	Major tegument protein	AGZ95154	BNRF1	L	A0201	Viral tegument	Host virus interaction	EGF60667.1 (66.67)	XP_011518933.1 (55.56)
DEVEFLGHY	mRNA export factor ICP27 homolog	Q04360	BMLF1	E	B18	Host nucleus and cytoplasm	Viral mRNAs transporter	EMH22829.1 (77.78)	BAB71363.1 (66.66)
GLCTLVAML	mRNA export factor ICP27 homolog	Q04360	BMLF1	E	A0201 A2	Host nucleus and cytoplasm	Viral mRNAs transporter	EES69475.1 (88.89)	CAI56794.1 (66.67)
KDTWLDARM	mRNA export factor ICP27 homolog	Q04360	BMLF1	E	HLA-class I	Host nucleus and cytoplasm	Viral mRNAs transporter	OFN79021.1 (77.78)	NP_077277.1 (77.78)
VLFGLLCLL	Protein BNLF2a	YP_401721	BNLF2A	E	A2	Host endoplasmic reticulum membrane	Inhibition of adaptive response	EGK00617.1 (77.78)	AAF28989.1 (66.66)
RVRAYTYSK	Replication and transcription activator	P03209	BRLF1	E	A0301 A3	Host nucleus	DNA binding, host-virus interaction	EEY91922.1 (66.67)	CAE46202.1 (55.56)
YVLDHLIVV	Replication and transcription activator	P03209	BRLF1	E	A0201 A2	Host nucleus	DNA binding, host-virus interaction	EPH07203.1 (88.89)	XP_011535331.1 (66.67)
KLGPGEEQV	Secreted protein BARF1	CAD53469	BARF1	E	A0201	Secreted	Oncogene	KGF18587.1 (88.89)	NP_001123372.1 (66.66)
LLIEGIFFI	Secreted protein BARF1	AFJ06848	BARF1	E	A0201	Secreted	Oncogene	EHG33806.1 (77.78)	AAS00388.1 (55.56)
RFIAQLLLL	Secreted protein BARF1	CAD53469	BARF1	E	A0201	Secreted	Oncogene	NO_HIT (-)	XP_011509701.1 (77.78)
TLTSYWRRV	Secreted protein BARF1	CAD53469	BARF1	E	A0201	Secreted	Oncogene	KMW11120.1 (66.67)	EAW89076.1 (66.67)
LPCVLWPVL	Trans-activator protein BZLF1	P03206	BZLF1	IE	B0702	Host nucleus	TF, latent to lytic switch	ETN46892.1 (77.78)	XP_011511695.1 (55.56)
SENDRLRLL	Trans-activator protein BZLF1	P03206	BZLF1	IE	B4002 B60	Host nucleus	TF, latent to lytic switch	EGG37664.1 (77.78)	EAW88969.1 (77.78)
(1) Developmental stage", "Subcellular localization" and "Function" were obtained from UniProtKB.
(2) Closest BLAST hit to proteins human microbiome project. Identity in parenthesis.
(3) Closest BLAST hit to human proteins in NR. Identity in parenthesis.

## Sheet: Table S2B.cons.CD4 epitopes
Table S2A: Conserved EBV-specific CD4 T cell epitopes recognized in the course of a natural infection by EBV
Epitope	Antigen	Antigen ID	Experimental HLA-I restriction	BLAST HIT HMP (%)(1)	BLAST HIT HUMAN (%)(2)
MLGQDDFIKFKSPLV	BFRF1	P03185	DRB1*0701	EIY33207.1 (46.67)	NP_001284364.1 (53.33)
AGLTLSLLVICSYLFISRG	BHRF1	P03182	DR2	EKN19533.1 (47.37)	EAW92092.1 (52.63)
LEKQLFYYIGTMLPNTRPHS	BXLF2	P03231	DR51	EDK25013.1 (30.00)	XP_005273605.1 (35.00)
SRRFSWTLFLAGLTLSLLVI	BHRF1	P03182	DR2	EEZ79072.1 (50.00)	XP_011541890.1 (50.00)
SRDELLHTRAASLLY	BARF1	P0CAP6	DRB1*0701	EPB87510.1 (66.67)	XP_011514101.1 (66.67)
PPVVRMFMRERQLPQ	EBNA6	P03204	HLA class II	EFV04068.1 (46.67)	AAP34452.1 (60.00)
QQRPVMFVSRVPAKK	EBNA6	P03204	HLA class II	EFM02838.1 (46.66)	EAW97604.1 (46.67)
PAQPPPGVINDQQLHHLPSG	EBNA2	P12978	DRB1*0301	EGK11071.1 (40.00)	XP_011510343.1 (40.00)
VKLTMEYDDKVSKSH	BMRF1	P03191	DRB1*0301	KGF17973.1 (60.00)	BAA19664.2 (46.67)
QKRAAPPTVSPSDTG	EBNA6	P03204	HLA class II	EKU84671.1 (60.00)	Q9H0A3.1 (53.34)
(1) Closest BLAST hit to proteins human microbiome project. Identity in parenthesis.
(2) Closest BLAST hit to human proteins in NR. Identity in parenthesis.

## Sheet: Table S2C. cons.B epitopes
Table S2B: Conserved EBV-specific B cell epitopes linked to any human disease
Epitope	Antigen name	Antigen ID	Viral gene	Subcellular localization	Disease	Response	Isotype	PMID	BLAST HIT HMP (%)(1)	BLAST HIT HUMAN (%)(2)
DPVGHPAAPRAPGPE	Uncharacterized protein LF3	YP_401707	LF3	-	systemic lupus erythematosus	Polyclonal	IgG	15894513	EFC68964.1 (53.33)	NP_001010927.1 (60.00)
ETFTETWNRFITHTE	Apoptosis regulator BHRF1	P03182	BHRF1	Host membrane	DND	Polyclonal	IgG	7678829	EGA91536.1 (60.00)	BAA20797.2 (40.00)
GMLEASEGLDGWIHQ	Apoptosis regulator BHRF1	P03182	BHRF1	Host membrane	DND	Polyclonal	IgG	7678829	EJZ82215.1 (53.33)	EAW75414.1 (46.67)
HQQGGWSTLIEDNIP	Apoptosis regulator BHRF1	P03182	BHRF1	Host membrane	DND	Polyclonal	IgG	7678829	EGC74166.1 (53.33)	BAC04017.1 (46.67)
TGGVYHFVKKHVHES	DNA polymerase catalytic subunit	CEQ38174	BALF5	Host nucleus	multiple sclerosis	Polyclonal	IgG	26831522	EKA99339.1 (53.33)	EAW92223.1 (40.00)
VSGFISFFKNPFGGM	Envelope glycoprotein B	ABB89287	gB BALF4	Viral envelope	DND	Polyclonal	IgG	9276728	EKX95574.1 (66.67)	NP_001131141.1 (53.34)
QKRAAQRAAGPSVAS	Envelope glycoprotein B	P03188	gB BALF4	Viral envelope	rheumatoid arthritis	Polyclonal	IgG	9239413	EEI16473.1 (60.00)	Q68CP4.2 (66.67)
PSTSSKLRPRWTFTSPPVTT	Envelope glycoprotein gp350	CEQ37962	BLLF1	Viral envelope	multiple sclerosis	Polyclonal	IgG	26831522	OFQ71364.1 (45.00)	BAG62186.1 (45.00)
QVSLESVDVYFQDVFGTMWC	Envelope glycoprotein gp350	CEQ43370	BLLF1	Viral envelope	multiple sclerosis	Polyclonal	IgG	26831522	EFS30178.1 (50.00)	XP_011542818.1 (35.00)
TNTTDITYVGD	Envelope glycoprotein gp350	CEQ43370	BLLF1	Viral envelope	multiple sclerosis	Polyclonal	IgG	26831522	KXB55733.1 (72.73)	EAX09696.1 (45.46)
YVFYSGNGPKASGGDYCIQS	Envelope glycoprotein gp350	CEQ43370	BLLF1	Viral envelope	multiple sclerosis	Polyclonal	IgG	26831522	EES72317.1 (40.00)	BAG62675.1 (40.00)
SKAPESTTTSPTLNTTGFAD	Envelope glycoprotein gp350	SRC298290	BLLF1	Viral envelope	DND	Polyclonal	IgG	25694592	EEG29142.1 (55.00)	EAW60293.1 (55.00)
GGDNHGRGRGRGRGRGGGRPGAPG + CITR(R11, R15)	Epstein-Barr nuclear antigen 1	ABB89251	EBNA1	Host nucleus	DND	Polyclonal	IgG	16508937	EFW10134.1 (58.34)	EAW60293.1 (-)
GGDNHGRGRGRGRGRGGGRPGAPG + CITR(R13,R15)	Epstein-Barr nuclear antigen 1	ABB89251	EBNA1	Host nucleus	DND	Polyclonal	IgG	16508937	EFW10134.1 (58.34)	EAW60293.1 (-)
GGDNHGRGRGRGRGRGGGRPGAPG + CITR(R15)	Epstein-Barr nuclear antigen 1	ABB89251	EBNA1	Host nucleus	DND	Polyclonal	IgG	16508937	EFW10134.1 (58.34)	EAW60293.1 (-)
GGDNHGRGRGRGRGRGGGRPGAPG + CITR(R7, R9, R11, R13, R15, R19)	Epstein-Barr nuclear antigen 1	ABB89251	EBNA1	Host nucleus	DND	Polyclonal	IgG	16508937	EFW10134.1 (58.34)	EAW60293.1 (-)
DPGEGPSTGPRGQGDGGRRK	Epstein-Barr nuclear antigen 1	Q777E1	EBNA1	Host nucleus	multiple sclerosis	Polyclonal	IgG	19733917	KXB49211.1 (50.00)	NP_065803.2 (50.00)
GDEGGDGDEGEEGQE	Epstein-Barr nuclear antigen 1	Q777E1	EBNA1	Host nucleus	DND	Polyclonal	IgG	2444542	EHP46569.1 (46.67)	XP_011532729.1 (53.33)
GGRPGAPGGSGSGPRHRDGV	Epstein-Barr nuclear antigen 1	Q777E1	EBNA1	Host nucleus	multiple sclerosis	Polyclonal	IgG	19733917	EEY94831.1 (40.00)	BAG63647.1 (55.00)
GSGPRHRDGVRRPQKRPSCI	Epstein-Barr nuclear antigen 1	Q777E1	EBNA1	Host nucleus	multiple sclerosis	Polyclonal	IgG	19733917	EGM98801.1 (50.00)	AAL75943.1 (50.00)
KGGWFGKHRGQGGS	Epstein-Barr nuclear antigen 1	Q777E1	EBNA1	Host nucleus	DND	Polyclonal	IgG	2164400	EHM37286.1 (64.29)	XP_011536405.1 (57.14)
PQRRGGDNHGRGRGRGRGRG	Epstein-Barr nuclear antigen 1	Q777E1	EBNA1	Host nucleus	multiple sclerosis	Polyclonal	IgG	19733917	ERH24622.1 (55.00)	BAG64089.1 (35.00)
RARGRGRGRGEKRP	Epstein-Barr nuclear antigen 1	Q777E1	EBNA1	Host nucleus	DND	Polyclonal	IgG	2444542	EJF37667.1 (71.43)	BAG64089.1 (-)
RGGSGGRGRGGSGG	Epstein-Barr nuclear antigen 1	Q777E1	EBNA1	Host nucleus	DND	Polyclonal	IgG	2164400	NO_HIT (-)	BAG64089.1 (-)
RGQGDGGRRKKGG	Epstein-Barr nuclear antigen 1	Q777E1	EBNA1	Host nucleus	DND	Polyclonal	IgG	2164400	EGK13545.1 (61.54)	EAW90534.1 (53.85)
RGRGRGRGRGGGRPGAPGGS	Epstein-Barr nuclear antigen 1	Q777E1	EBNA1	Host nucleus	multiple sclerosis	Polyclonal	IgG	19733917	NO_HIT (-)	EAW90534.1 (-)
RPRSPSSQSSSSGSPPRRP	Epstein-Barr nuclear antigen 1	Q777E1	EBNA1	Host nucleus	DND	Polyclonal	IgG	2164400	ETN45595.1 (47.37)	EAW94519.1 (42.10)
SGSPPRRPPPGRRPFFHPVG	Epstein-Barr nuclear antigen 1	Q777E1	EBNA1	Host nucleus	multiple sclerosis	Polyclonal	IgG	19733917	ESK64742.1 (45.00)	EAX01949.1 (50.00)
AEVLKDAIKDLVMTKPAPTC	Epstein-Barr nuclear antigen 1	P03211	EBNA1	Host nucleus	nasopharyngeal carcinoma	Polyclonal	IgA	1719023	EFK35191.1 (45.00)	CAB70845.1 (40.00)
AGGAGAGGAGAGGAG	Epstein-Barr nuclear antigen 1	P03211	EBNA1	Host nucleus	DND	Polyclonal	IgG	24798244	NO_HIT (-)	CAB70845.1 (-)
AGGAGAGGAGGAGAG	Epstein-Barr nuclear antigen 1	P03211	EBNA1	Host nucleus	DND	Polyclonal	IgG	24798244	NO_HIT (-)	CAB70845.1 (-)
QNPVYLIPETVPYIKWDN	Envelope glycoprotein GP350	P03200	BLLF1	Viral envelope	DND	Monoclonal	IgG	25694592	EGW52329.1 (50.00)	CAH10467.1 (38.89)
APGPGPQPGPLRESI	Epstein-Barr nuclear antigen 1	P03211	EBNA1	Host nucleus	DND	Polyclonal	IgG	24798244	EEW16383.1 (60.00)	EAW51097.1 (53.34)
SVKTEMLGNEID	Envelope glycoprotein	P03200	BLLF1	Viral envelope	DND	Monoclonal	IgG	25694592	EGF87240.1 (66.67)	EAX03640.1 (50.00)
DPGEGPSTGPRGQGDGGRRK + CITR(R11)	Epstein-Barr nuclear antigen 1	P03211	EBNA1	Host nucleus	DND	Polyclonal	IgG	26796582	KXB49211.1 (50.00)	NP_065803.2 (50.00)
GDDGDDGDEGGDGDE	Epstein-Barr nuclear antigen 1	Q3KSS4	EBNA1	Host nucleus	systemic lupus erythematosus	Polyclonal	IgG	7533789	ETN42513.1 (53.33)	XP_011532729.1 (60.00)
GDDGDDGDEGGDGDEGEEGQE	Epstein-Barr nuclear antigen 1	P03211	EBNA1	Host nucleus	DND	Polyclonal	IgG	26796582	EHP46569.1 (52.38)	XP_011532729.1 (52.38)
GGDNHGRGRGRGRGRGGGRPGAPG	Epstein-Barr nuclear antigen 1	Q3KSS4	EBNA1	Host nucleus	DND	Polyclonal	IgG	23379431	EFW10134.1 (58.34)	XP_011532729.1 (-)
GGSGGRGRGGSGGRGRGGSG	Epstein-Barr nuclear antigen 1	P03211	EBNA1	Host nucleus	nasopharyngeal carcinoma	Polyclonal	IgA	1719023	NO_HIT (-)	XP_011532729.1 (-)
GGSGPQRRGG	Epstein-Barr nuclear antigen 1	Q3KSS4	EBNA1	Host nucleus	systemic scleroderma	Polyclonal	IgG	11862315	ERI68717.1 (70.00)	EAW71221.1 (80.00)
GRGRGRGEKRPRSPSSQSSS + CITR(R2)	Epstein-Barr nuclear antigen 1	P03211	EBNA1	Host nucleus	DND	Polyclonal	IgG	26796582	EHY61157.1 (50.00)	BAC05189.1 (55.00)
GRGRGRGEKRPRSPSSQSSS + CITR(R4)	Epstein-Barr nuclear antigen 1	P03211	EBNA1	Host nucleus	DND	Polyclonal	IgG	26796582	EHY61157.1 (50.00)	BAC05189.1 (55.00)
GRGRGRGEKRPRSPSSQSSS + CITR(R6)	Epstein-Barr nuclear antigen 1	P03211	EBNA1	Host nucleus	DND	Polyclonal	IgG	26796582	EHY61157.1 (50.00)	BAC05189.1 (55.00)
GRPGAPGGSGSGPRHRDGVR	Epstein-Barr nuclear antigen 1	P03211	EBNA1	Host nucleus	nasopharyngeal carcinoma	Polyclonal	IgA	1719023	OFS25527.1 (55.00)	BAG63647.1 (55.00)
GSGGRGRGGSGGRRGRGRER + CITR(R14)	Epstein-Barr nuclear antigen 1	P03211	EBNA1	Host nucleus	DND	Polyclonal	IgG	26796582	NO_HIT (-)	BAG63647.1 (-)
GSGGRGRGGSGGRRGRGRER + CITR(R16)	Epstein-Barr nuclear antigen 1	P03211	EBNA1	Host nucleus	DND	Polyclonal	IgG	26796582	NO_HIT (-)	BAG63647.1 (-)
GSGGRGRGGSGGRRGRGRER + CITR(R5)	Epstein-Barr nuclear antigen 1	P03211	EBNA1	Host nucleus	DND	Polyclonal	IgG	26796582	NO_HIT (-)	BAG63647.1 (-)
GSGGRGRGGSGGRRGRGRER + CITR(R7)	Epstein-Barr nuclear antigen 1	P03211	EBNA1	Host nucleus	DND	Polyclonal	IgG	26796582	NO_HIT (-)	BAG63647.1 (-)
KRPRSPSSQSSSSGS	Epstein-Barr nuclear antigen 1	P03211	EBNA1	Host nucleus	DND	Polyclonal	IgG	24798244	EEG54170.1 (60.00)	NP_835260.2 (60.00)
PGEGPSTGPRGQGDGGRRKK	Epstein-Barr nuclear antigen 1	P03211	EBNA1	Host nucleus	healthy	Polyclonal	IgG	1719023	KXB49211.1 (50.00)	NP_065803.2 (50.00)
PPMVEGAAAEGDDGDDGDEG	Epstein-Barr nuclear antigen 1	P03211	EBNA1	Host nucleus	DND	Polyclonal	IgG	26796582	ERH30799.1 (55.00)	XP_011544445.1 (60.00)
PQRRGGDNHGRGRGRGRGRG + CITR(R13)	Epstein-Barr nuclear antigen 1	P03211	EBNA1	Host nucleus	DND	Polyclonal	IgG	26796582	ERH24622.1 (55.00)	BAG64089.1 (35.00)
PQRRGGDNHGRGRGRGRGRG + CITR(R15)	Epstein-Barr nuclear antigen 1	P03211	EBNA1	Host nucleus	DND	Polyclonal	IgG	26796582	ERH24622.1 (55.00)	BAG64089.1 (35.00)
PQRRGGDNHGRGRGRGRGRG + CITR(R17)	Epstein-Barr nuclear antigen 1	P03211	EBNA1	Host nucleus	DND	Polyclonal	IgG	26796582	ERH24622.1 (55.00)	BAG64089.1 (35.00)
PQRRGGDNHGRGRGRGRGRG + CITR(R19)	Epstein-Barr nuclear antigen 1	P03211	EBNA1	Host nucleus	DND	Polyclonal	IgG	26796582	ERH24622.1 (55.00)	BAG64089.1 (35.00)
PQRRGGDNHGRGRGRGRGRG + CITR(R4)	Epstein-Barr nuclear antigen 1	P03211	EBNA1	Host nucleus	DND	Polyclonal	IgG	26796582	ERH24622.1 (55.00)	BAG64089.1 (35.00)
PRSPSSQSSSSGSPPRRPPP	Epstein-Barr nuclear antigen 1	P03211	EBNA1	Host nucleus	DND	Polyclonal	IgG	26796582	OFQ56681.1 (55.00)	BAF82674.1 (50.00)
RGGSGGRGRGGSGGRGRGGS + CITR(R1)	Epstein-Barr nuclear antigen 1	P03211	EBNA1	Host nucleus	DND	Polyclonal	IgG	26796582	NO_HIT (-)	BAF82674.1 (-)
RGGSGGRGRGGSGGRGRGGS + CITR(R15)	Epstein-Barr nuclear antigen 1	P03211	EBNA1	Host nucleus	DND	Polyclonal	IgG	26796582	NO_HIT (-)	BAF82674.1 (-)
RGGSGGRGRGGSGGRGRGGS + CITR(R17)	Epstein-Barr nuclear antigen 1	P03211	EBNA1	Host nucleus	DND	Polyclonal	IgG	26796582	NO_HIT (-)	BAF82674.1 (-)
RGGSGGRGRGGSGGRGRGGS + CITR(R7)	Epstein-Barr nuclear antigen 1	P03211	EBNA1	Host nucleus	DND	Polyclonal	IgG	26796582	NO_HIT (-)	BAF82674.1 (-)
RGGSGGRGRGGSGGRGRGGS + CITR(R9)	Epstein-Barr nuclear antigen 1	P03211	EBNA1	Host nucleus	DND	Polyclonal	IgG	26796582	NO_HIT (-)	BAF82674.1 (-)
RGRGRGEKRPRSPSSQSSSS	Epstein-Barr nuclear antigen 1	P03211	EBNA1	Host nucleus	nasopharyngeal carcinoma	Polyclonal	IgA	1719023	EHY61157.1 (50.00)	BAC05189.1 (50.00)
RGRGRGRGRGGGRPGAPGGS + CITR(R1)	Epstein-Barr nuclear antigen 1	P03211	EBNA1	Host nucleus	DND	Polyclonal	IgG	26796582	NO_HIT (-)	BAC05189.1 (-)
RGRGRGRGRGGGRPGAPGGS + CITR(R3)	Epstein-Barr nuclear antigen 1	P03211	EBNA1	Host nucleus	DND	Polyclonal	IgG	26796582	NO_HIT (-)	BAC05189.1 (-)
RGRGRGRGRGGGRPGAPGGS + CITR(R5)	Epstein-Barr nuclear antigen 1	P03211	EBNA1	Host nucleus	DND	Polyclonal	IgG	26796582	NO_HIT (-)	BAC05189.1 (-)
RGRGRGRGRGGGRPGAPGGS + CITR(R7)	Epstein-Barr nuclear antigen 1	P03211	EBNA1	Host nucleus	DND	Polyclonal	IgG	26796582	NO_HIT (-)	BAC05189.1 (-)
RGRGRGRGRGGGRPGAPGGS + CITR(R9)	Epstein-Barr nuclear antigen 1	P03211	EBNA1	Host nucleus	DND	Polyclonal	IgG	26796582	NO_HIT (-)	BAC05189.1 (-)
SGPEGSGGSGPQRRGGDNHG + CITR(R14)	Epstein-Barr nuclear antigen 1	P03211	EBNA1	Host nucleus	DND	Polyclonal	IgG	26796582	EEH86180.2 (50.00)	AHW56609.1 (45.00)
SGPRHRDGVRRPQKRPSCIG	Epstein-Barr nuclear antigen 1	P03211	EBNA1	Host nucleus	healthy	Polyclonal	IgG	1719023	EGM98801.1 (50.00)	AAL75943.1 (50.00)
SSQSSSSGSPPRRPP	Epstein-Barr nuclear antigen 1	P03211	EBNA1	Host nucleus	DND	Polyclonal	IgG	24798244	EJN83942.1 (66.67)	EAW52201.1 (66.67)
GGDNHGRGRGRGRGRGGGRPGAPG + CITR(R7, R9, R11, R13, R19)	Epstein-Barr nuclear antigen 1	NP_039875	EBNA1	Host nucleus	DND	Polyclonal	IgG	27255888	EFW10134.1 (58.34)	EAW52201.1 (-)
GQSRGQSRG + CITR(R4, R8)	Epstein-Barr nuclear antigen 1	AAA45903	EBNA1	Host nucleus	rheumatoid arthritis	Polyclonal-Monospecific	IgG	21413944	EHL67491.1 (66.67)	BAC85992.1 (77.78)
GQSRGQSRGRGRGRGRGRGKG + CITR(R4, R8, R10, R12, R14, R16, R18)	Epstein-Barr nuclear antigen 1	AAA45903	EBNA1	Host nucleus	rheumatoid arthritis	Polyclonal	IgG	21413944	EEK17558.1 (47.62)	BAC85992.1 (-)
PPRPTRPTTLPPTPLLT	Epstein-Barr nuclear antigen 2	CEQ43349	EBNA2	Host nucleus matrix	multiple sclerosis	Polyclonal	IgG	26831522	EKY01940.1 (52.94)	AAC50694.1 (58.83)
GQSRGQSRGRGRGRGRGRGKG + CITR(R4, R8, R11, R12, R14, R16, R18)	Epstein-Barr nuclear antigen 2	P12978	EBNA2	Host nucleus matrix	DND	Polyclonal	IgG	27255888	EEK17558.1 (47.62)	AAC50694.1 (-)
DLSIHGRPCPQAPEW	Epstein-Barr nuclear antigen 3	P12977.2	EBNA3	Host nucleus matrix	DND	Polyclonal	IgG	24798244	EIY34793.1 (46.67)	NP_085151.1 (53.33)
EQGKEVLEKARGSTY	Epstein-Barr nuclear antigen 3	P12977.2	EBNA3	Host nucleus matrix	DND	Polyclonal	IgG	24798244	EDY94430.1 (60.00)	EAW57667.1 (53.33)
RKRVDHDAGGSAPAR	Epstein-Barr nuclear antigen 3	P12977.2	EBNA3	Host nucleus matrix	DND	Polyclonal	IgG	24798244	KXB52354.1 (53.33)	BAA74880.1 (66.67)
VPKPRPEVPQSDETA	Epstein-Barr nuclear antigen 3	P12977.2	EBNA3	Host nucleus matrix	DND	Polyclonal	IgG	24798244	EGD32460.1 (60.00)	EAW82527.1 (60.00)
KQILRQLLTGGVKKG	Epstein-Barr nuclear antigen 4	P03203.3	EBNA4	Host nucleus	DND	Polyclonal	IgG	24798244	EHM92248.1 (53.33)	BAA91573.1 (46.66)
LSVQARLEPWQPLPG	Epstein-Barr nuclear antigen 4	P03203.3	EBNA4	Host nucleus	DND	Polyclonal	IgG	24798244	EFR56215.1 (60.00)	AAC27673.1 (60.00)
QARLEPWQPLPGPQV	Epstein-Barr nuclear antigen 4	P03203.3	EBNA4	Host nucleus	DND	Polyclonal	IgG	24798244	EMB27791.1 (46.67)	EAW84446.1 (53.33)
DIRRGPLVAEGGVGW	Epstein-Barr nuclear antigen 6	P03204	EBNA6	Host nucleus	DND	Polyclonal	IgG	24798244	EEZ28043.1 (60.00)	EAW54969.1 (46.67)
GHGQDQVSQFPHLQS	Epstein-Barr nuclear antigen 6	P03204	EBNA6	Host nucleus	DND	Polyclonal	IgG	24798244	EPD75125.1 (53.33)	EAW92877.1 (40.00)
HTQGPWDPRAPHLPP	Epstein-Barr nuclear antigen 6	P03204	EBNA6	Host nucleus	DND	Polyclonal	IgG	24798244	OFQ98250.1 (60.00)	NP_055646.2 (46.67)
PIPTRFPPPPMPLQDSMAVG	Epstein-Barr nuclear antigen 6	P03204	EBNA6	Host nucleus	DND	Polyclonal	IgG	7595412	OFQ98410.1 (45.00)	EAW68959.1 (40.00)
RLQDIRRGPLVAEGG	Epstein-Barr nuclear antigen 6	P03204	EBNA6	Host nucleus	DND	Polyclonal	IgG	24798244	EEQ56627.1 (60.00)	2OVJ (53.34)
AAVPVLAFDAARLRLLE	Inner tegument protein	AFJ06845.2	BOLF1	Viral capsid	DND	Polyclonal	IgG	25392335	EEG90696.1 (52.94)	XP_011525320.1 (52.94)
VPVLAFDAARLRLLE	Inner tegument protein	YP_401653	BOLF1	Viral capsid	multiple sclerosis	Polyclonal	IND	10491006	EEG90696.1 (53.33)	BAC03987.1 (60.00)
SGSGGDDDDPHGPVQ	Latent membrane protein 1	P03230	LMP1	Host cell membrane	DND	Polyclonal	IgG	24798244	ERT03127.1 (53.33)	EAW74200.1 (53.33)
QDPDNTDDNGPQDPDNTD	Latent membrane protein 1	AHI43005	LMP1	Host cell membrane	DND	Polyclonal	IgG	26831522	EDP26877.1 (55.55)	BAG59280.1 (50.00)
VPTIAHGDGRRPSKQRTFI	Major capsid protein	P03226	MCP	Virion	viral infection	Polyclonal	IgG	1703730	OFT19955.1 (47.37)	AAF44626.1 (42.11)
GLCTLVAML	mRNA export factor ICP27 homolog	CAD53409	BMLF1	Host nucleus	DND	Monoclonal	IgG	16237088	EES69475.1 (88.89)	CAI56794.1 (66.67)
LSERIVRDGLFNSQFIALMPTSGCAQVTGCSDA	Ribonucleoside-diphosphate reductase large subunit	CAD53405	RIR1	Host nucleus	DND	Polyclonal	IgG	10502273	AOY34171.1 (45.46)	XP_011518581.1 (42.42)
ASSAPSTAVAQS	Small capsomere interacting protein	CEQ35232	BFRF3	Viral capsid	multiple sclerosis	Polyclonal	IgG	26831522	NO_HIT (-)	EAW50562.1 (66.67)
GALASSAPSTAV	Small capsomere interacting protein	CEQ35232	BFRF3	Viral capsid	multiple sclerosis	Polyclonal	IgG	26831522	KXB52517.1 (75.00)	CDJ98632.1 (58.34)
GTGALASSAPST	Small capsomere interacting protein	CEQ35232	BFRF3	Viral capsid	multiple sclerosis	Polyclonal	IgG	26831522	OFS93337.1 (75.00)	XP_005260825.1 (66.67)
LPNDVFREAQRS	Small capsomere interacting protein	CEQ35232	BFRF3	Viral capsid	multiple sclerosis	Polyclonal	IgG	26831522	OFM85351.1 (75.00)	BAG63611.1 (58.34)
NLPNDVFREAQR	Small capsomere interacting protein	CEQ35232	BFRF3	Viral capsid	multiple sclerosis	Polyclonal	IgG	26831522	OFM85351.1 (75.00)	AEX28847.1 (50.00)
NNLPNDVFREAQ	Small capsomere interacting protein	CEQ35232	BFRF3	Viral capsid	multiple sclerosis	Polyclonal	IgG	26831522	OFM85351.1 (66.67)	XP_011533958.1 (58.34)
NQNNLPNDVFRE	Small capsomere interacting protein	CEQ35232	BFRF3	Viral capsid	multiple sclerosis	Polyclonal	IgG	26831522	EEU03464.1 (58.33)	AEX28847.1 (58.33)
PNDVFREAQRSY	Small capsomere interacting protein	CEQ35232	BFRF3	Viral capsid	multiple sclerosis	Polyclonal	IgG	26831522	EGY66124.1 (66.67)	XP_011533958.1 (58.34)
QNNLPNDVFREA	Small capsomere interacting protein	CEQ35232	BFRF3	Viral capsid	multiple sclerosis	Polyclonal	IgG	26831522	OFM85351.1 (66.67)	AEX28847.1 (50.00)
SAGTGALASSAP	Small capsomere interacting protein	CEQ35232	BFRF3	Viral capsid	multiple sclerosis	Polyclonal	IgG	26831522	EEZ62199.1 (75.00)	XP_005260825.1 (66.67)
SSAPSTAVAQSA	Small capsomere interacting protein	CEQ35232	BFRF3	Viral capsid	multiple sclerosis	Polyclonal	IgG	26831522	EEQ66416.1 (66.67)	XP_011508885.1 (58.33)
TGALASSAPSTA	Small capsomere interacting protein	CEQ35232	BFRF3	Viral capsid	multiple sclerosis	Polyclonal	IgG	26831522	EGG82562.1 (75.00)	XP_005261006.1 (58.34)
ADFPDSPLLPKFQEL	Small capsomere-interacting protein	P14348	SCP	Viral capsid	DND	Polyclonal	IgG	24798244	OFL18975.1 (53.34)	EAW72076.1 (53.33)
AVDTGSGGGGQPHDTAPRGARKKQ	Small capsomere-interacting protein	P14348	SCP	Viral capsid	DND	Polyclonal	IgG	12121125	OFM04692.1 (45.83)	AAH34511.1 (37.50)
RLPKPTLQGRLEADF	Small capsomere-interacting protein	P14348	SCP	Viral capsid	DND	Polyclonal	IgG	24798244	EFC89332.1 (46.67)	CAC94373.1 (46.67)
STAVAQSATPSVSSSISSLRAATSGATAAA	Small capsomere-interacting protein	P14348	SCP	Viral capsid	DND	Polyclonal	IgG	8014488	EFB31458.1 (43.33)	XP_005265997.1 (40.00)
APENAYQAYAAPQLFPVSDITQ	Trans-activator protein BZLF1	AAA66529	BZLF1	Host nucleus	DND	Polyclonal	IgG	7750123	EGX72012.1 (45.46)	EAW79652.1 (36.36)
EDVKFTPDPYQVPFVQAFDQAT	Trans-activator protein BZLF1	AAA66529	BZLF1	Host nucleus	DND	Polyclonal	IgG	7750123	ERI94359.1 (36.36)	XP_006710674.1 (31.82)
FTPDPYQVPF	Trans-activator protein BZLF1	AAA66529	BZLF1	Host nucleus	DND	Polyclonal	IgG	7750123	EEW50977.1 (70.00)	XP_011521065.1 (60.00)
MMDPNSTSEDVKFTPDPYQVPF	Trans-activator protein BZLF1	AAA66529	BZLF1	Host nucleus	DND	Polyclonal	IgG	8705686	EHL05306.1 (36.36)	NP_001180217.1 (40.91)
QAPLPCVLWPVLPEPLPQGQLT	Trans-activator protein BZLF1	AAA66529	BZLF1	Host nucleus	DND	Polyclonal	IgG	7750123	OFP70297.1 (40.91)	XP_011507277.1 (40.91)
AFDQATRVYQDLGGPSQAPLPC	Trans-activator protein BZLF1	AAA66529	BZLF1	Host nucleus	DND	Polyclonal	IgG	7750123	OHP87661.1 (45.45)	AAC83664.1 (40.91)
(1) Closest BLAST hit to proteins human microbiome project. Identity in parenthesis.
(2) Closest BLAST hit to human proteins in NR. Identity in parenthesis.
